# Supplementary material for: Bio-Herbicidal Potential of Nanoemulsions with Peppermint Oil on Barnyard Grass and Maize
Source: MDPI journal article supplement (doi:10.3390/molecules27113480), 2022-05-28
Supplement: s1 [file s1]

**Tabela S1.** Chl *a* fluorescence parameters for control maize leaves and treated with herbicide, surfactants and PNs. Mean values marked with the same letters did not differ significantly at  $p \leq 0.05$  according to Duncan's test,  $n = 15$ . The percentage values of changes compared to the control plants (taken as 100%) are given in parenthesis.

| parametrs      | maize               |                      |                     |                     |                      |                     |                      |                     |                     |
|----------------|---------------------|----------------------|---------------------|---------------------|----------------------|---------------------|----------------------|---------------------|---------------------|
|                | C                   | H                    | S1                  | S5                  | PN1                  | PN2                 | PN3                  | PN4                 | PN5                 |
| <b>Fv/Fm</b>   | 0.798 <sup>ab</sup> | 0.785 <sup>abc</sup> | 0.798 <sup>ab</sup> | 0.805 <sup>a</sup>  | 0.796 <sup>abc</sup> | 0.798 <sup>ab</sup> | 0.789 <sup>abc</sup> | 0.777 <sup>c</sup>  | 0.784 <sup>bc</sup> |
|                |                     | (-1.6)               | (0)                 | (+0.9)              | (-0.3)               | (0)                 | (-1.2)               | (-2.6)              | (-1.7)              |
| <b>Fv/Fo</b>   | 4.000 <sup>a</sup>  | 3.729 <sup>ab</sup>  | 3.999 <sup>a</sup>  | 4.150 <sup>a</sup>  | 3.941 <sup>ab</sup>  | 4.013 <sup>a</sup>  | 3.771 <sup>ab</sup>  | 3.515 <sup>b</sup>  | 3.684 <sup>ab</sup> |
|                |                     | (-6.8)               | (0)                 | (+3.7)              | (-1.5)               | (+0.3)              | (-5.7)               | (-12.1)             | (-7.9)              |
| <b>ABS/RC</b>  | 1.939 <sup>bc</sup> | 2.028 <sup>b</sup>   | 1.916 <sup>bc</sup> | 1.962 <sup>bc</sup> | 1.899 <sup>c</sup>   | 1.856 <sup>c</sup>  | 1.933 <sup>bc</sup>  | 2.029 <sup>b</sup>  | 2.147 <sup>a</sup>  |
|                |                     | (+4.6)               | (-1.2)              | (+1.161)            | (-2.1)               | (-4.3)              | (-0.3)               | (+4.6)              | (+10.7)             |
| <b>DIo/RC</b>  | 0.393 <sup>cd</sup> | 0.435 <sup>abc</sup> | 0.387 <sup>cd</sup> | 0.383 <sup>d</sup>  | 0.389 <sup>cd</sup>  | 0.375 <sup>d</sup>  | 0.409 <sup>bcd</sup> | 0.453 <sup>ab</sup> | 0.464 <sup>a</sup>  |
|                |                     | (+10.9)              | (-1.4)              | (-2.6)              | (-1.0)               | (-4.5)              | (+4.2)               | (+15.4)             | (+18.0)             |
| <b>TRo/RC</b>  | 1.547 <sup>bc</sup> | 1.592 <sup>b</sup>   | 1.528 <sup>bc</sup> | 1.579 <sup>b</sup>  | 1.510 <sup>bc</sup>  | 1.481 <sup>c</sup>  | 1.524 <sup>bc</sup>  | 1.576 <sup>b</sup>  | 1.683 <sup>a</sup>  |
|                |                     | (+3.0)               | (-1.2)              | (+2.1)              | (-2.4)               | (-4.2)              | (-1.5)               | (+1.9)              | (+8.8)              |
| <b>ETo/RC</b>  | 0.764 <sup>ab</sup> | 0.736 <sup>b</sup>   | 0.745 <sup>ab</sup> | 0.770 <sup>ab</sup> | 0.754 <sup>ab</sup>  | 0.757 <sup>ab</sup> | 0.774 <sup>ab</sup>  | 0.741 <sup>ab</sup> | 0.798 <sup>a</sup>  |
|                |                     | (-3.7)               | (-2.5)              | (+0.8)              | (-1.4)               | (-0.9)              | (+1.2)               | (-3.0)              | (+4.4)              |
| <b>ABS/CSm</b> | 1112 <sup>ab</sup>  | 1122 <sup>ab</sup>   | 1160 <sup>ab</sup>  | 1131 <sup>ab</sup>  | 1160 <sup>ab</sup>   | 1187 <sup>ab</sup>  | 1202 <sup>a</sup>    | 1140 <sup>ab</sup>  | 1100 <sup>b</sup>   |
|                |                     | (+0.9)               | (+4.3)              | (+1.6)              | (+4.2)               | (+6.7)              | (+8.0)               | (+2.5)              | (-1.1)              |
| <b>DIo/CSm</b> | 225 <sup>ab</sup>   | 242 <sup>ab</sup>    | 234 <sup>ab</sup>   | 221 <sup>b</sup>    | 236 <sup>ab</sup>    | 237 <sup>ab</sup>   | 253 <sup>a</sup>     | 253 <sup>a</sup>    | 238 <sup>ab</sup>   |
|                |                     | (+7.6)               | (+4.2)              | (-1.6)              | (+5.1)               | (+6.3)              | (+12.8)              | (+12.7)             | (+5.9)              |
| <b>TRo/CSm</b> | 888 <sup>ab</sup>   | 881 <sup>ab</sup>    | 926 <sup>ab</sup>   | 909 <sup>ab</sup>   | 924 <sup>ab</sup>    | 948 <sup>a</sup>    | 948 <sup>a</sup>     | 887 <sup>ab</sup>   | 862 <sup>b</sup>    |
|                |                     | (-0.8)               | (+4.3)              | (+2.4)              | (+4.0)               | (+6.8)              | (+6.8)               | (-0.1)              | (-2.9)              |
| <b>ETo/CSm</b> | 441 <sup>abc</sup>  | 406 <sup>c</sup>     | 453 <sup>abc</sup>  | 444 <sup>abc</sup>  | 465 <sup>ab</sup>    | 487 <sup>a</sup>    | 483 <sup>a</sup>     | 421 <sup>bc</sup>   | 409 <sup>bc</sup>   |
|                |                     | (-7.8)               | (+2.9)              | (+0.7)              | (+5.4)               | (+10.5)             | (+9.6)               | (-4.4)              | (-7.2)              |
| <b>PI</b>      | 2.053 <sup>a</sup>  | 1.586 <sup>b</sup>   | 2.033 <sup>a</sup>  | 2.042 <sup>a</sup>  | 2.153 <sup>a</sup>   | 2.319 <sup>a</sup>  | 2.052 <sup>a</sup>   | 1.604 <sup>b</sup>  | 1.567 <sup>b</sup>  |
|                |                     | (-22.8)              | (-1.0)              | (-0.5)              | (+4.8)               | (+13.0)             | (-0.1)               | (-21.9)             | (-23.7)             |

**Tabele S2.** Chl a fluorescence parameters for control barnyard grass leaves and treated with herbicide, surfactants and PNs. Mean values marked with the same letters did not differ significantly at  $p \leq 0.05$  according to Duncan's test,  $n = 15$ . The percentage values of changes compared to the control plants (taken as 100%) are given in parenthesis.

| parametrs      | Barnyard grass      |                                |                                 |                                |                                 |                                 |                                 |                                |                                |
|----------------|---------------------|--------------------------------|---------------------------------|--------------------------------|---------------------------------|---------------------------------|---------------------------------|--------------------------------|--------------------------------|
|                | C                   | H                              | S1                              | S5                             | PN1                             | PN2                             | PN3                             | PN4                            | PN5                            |
| <b>Fv/Fm</b>   | 0.814 <sup>a</sup>  | 0.808 <sup>a</sup><br>(-0.7)   | 0.811 <sup>a</sup><br>(-0.3)    | 0.808 <sup>a</sup><br>(-0.7)   | 0.804 <sup>a</sup><br>(-1.1)    | 0.808 <sup>a</sup><br>(-0.7)    | 0.806 <sup>a</sup><br>(-0.9)    | 0.814 <sup>a</sup><br>(0)      | 0.763 <sup>b</sup><br>(-6.2)   |
| <b>Fv/Fo</b>   | 4.379 <sup>a</sup>  | 4.231 <sup>a</sup><br>(-3.4)   | 4.315 <sup>a</sup><br>(-1.5)    | 4.231 <sup>a</sup><br>(-3.4)   | 4.153 <sup>a</sup><br>(-5.2)    | 4.265 <sup>a</sup><br>(-2.6)    | 4.180 <sup>a</sup><br>(-4.5)    | 4.467 <sup>a</sup><br>(+2.0)   | 3.385 <sup>b</sup><br>(-22.7)  |
| <b>ABS/RC</b>  | 1.819 <sup>cd</sup> | 1.991 <sup>ab</sup><br>(+9.4)  | 1.894 <sup>bcd</sup><br>(+4.1)  | 1.913 <sup>bcd</sup><br>(+5.2) | 1.967 <sup>abc</sup><br>(+8.2)  | 1.954 <sup>abcd</sup><br>(+7.4) | 1.956 <sup>abcd</sup><br>(+7.5) | 2.072 <sup>a</sup><br>(+13.9)  | 1.807 <sup>d</sup><br>(-0.7)   |
| <b>DIo/RC</b>  | 0.340 <sup>b</sup>  | 0.382 <sup>ab</sup><br>(+12.6) | 0.357 <sup>b</sup><br>(+5.2)    | 0.368 <sup>b</sup><br>(+8.2)   | 0.386 <sup>ab</sup><br>(+13.5)  | 0.377 <sup>ab</sup><br>(+10.9)  | 0.380 <sup>ab</sup><br>(+11.8)  | 0.387 <sup>ab</sup><br>(+13.9) | 0.428 <sup>a</sup><br>(+26.0)  |
| <b>TRo/RC</b>  | 1.479 <sup>cd</sup> | 1.608 <sup>ab</sup><br>(+8.7)  | 1.537 <sup>bc</sup><br>(+3.9)   | 1.545 <sup>bc</sup><br>(+4.5)  | 1.582 <sup>abc</sup><br>(+6.9)  | 1.578 <sup>abc</sup><br>(+6.6)  | 1.576 <sup>abc</sup><br>(+6.5)  | 1.686 <sup>a</sup><br>(+13.9)  | 1.379 <sup>d</sup><br>(-6.8)   |
| <b>ETo/RC</b>  | 0.797 <sup>a</sup>  | 0.776 <sup>abc</sup><br>(-2.7) | 0.765 <sup>abcd</sup><br>(-4.0) | 0.729 <sup>d</sup><br>(-8.5)   | 0.767 <sup>abcd</sup><br>(-3.8) | 0.750 <sup>bcd</sup><br>(-5.9)  | 0.790 <sup>ab</sup><br>(-0.8)   | 0.740 <sup>cd</sup><br>(-7.0)  | 0.631 <sup>e</sup><br>(-20.8)  |
| <b>ABS/CSm</b> | 1341 <sup>a</sup>   | 1183 <sup>ab</sup><br>(-11.8)  | 1209 <sup>ab</sup><br>(-9.9)    | 977 <sup>cd</sup><br>(-27.2)   | 1136 <sup>bc</sup><br>(-15.3)   | 1127 <sup>bc</sup><br>(-16.0)   | 1188 <sup>ab</sup><br>(-11.4)   | 839 <sup>de</sup><br>(-37.4)   | 697 <sup>e</sup><br>(-48.1)    |
| <b>DIo/CSm</b> | 251 <sup>a</sup>    | 227 <sup>a</sup><br>(-9.4)     | 228 <sup>a</sup><br>(-8.9)      | 187 <sup>bc</sup><br>(-25.3)   | 224 <sup>a</sup><br>(-10.6)     | 218 <sup>ab</sup><br>(-13.1)    | 232 <sup>a</sup><br>(-7.5)      | 155 <sup>cd</sup><br>(-38.3)   | 149 <sup>d</sup><br>(-40.6)    |
| <b>TRo/CSm</b> | 1091 <sup>a</sup>   | 956 <sup>ab</sup><br>(-12.3)   | 981 <sup>ab</sup><br>(-10.1)    | 790 <sup>cd</sup><br>(-27.6)   | 912 <sup>bc</sup><br>(-16.4)    | 909 <sup>bc</sup><br>(-16.6)    | 956 <sup>ab</sup><br>(-12.4)    | 685 <sup>d</sup><br>(-37.2)    | 548 <sup>c</sup><br>(-49.8)    |
| <b>ETo/CSm</b> | 589 <sup>a</sup>    | 467 <sup>b</sup><br>(-20.7)    | 491 <sup>b</sup><br>(-16.7)     | 377 <sup>cd</sup><br>(-36.0)   | 442 <sup>bc</sup><br>(-24.9)    | 434 <sup>bc</sup><br>(-26.3)    | 479 <sup>b</sup><br>(-18.7)     | 306 <sup>de</sup><br>(-48.1)   | 258 <sup>c</sup><br>(-56.2)    |
| <b>PI</b>      | 2.857 <sup>a</sup>  | 2.104 <sup>bc</sup><br>(-26.4) | 2.331 <sup>b</sup><br>(-18.4)   | 2.042 <sup>bc</sup><br>(-28.5) | 1.994 <sup>bc</sup><br>(-30.2)  | 2.040 <sup>bc</sup><br>(-28.6)  | 2.175 <sup>bc</sup><br>(-23.9)  | 1.765 <sup>c</sup><br>(-38.2)  | 2.157 <sup>bc</sup><br>(-24.5) |

**Table S3.** Matrix of the experimental design and experimental data obtained for the dependent variables.

| Sample | Input parameters        |                                |                  |       | Output parameters |              |                      |           |
|--------|-------------------------|--------------------------------|------------------|-------|-------------------|--------------|----------------------|-----------|
|        | C <sub>Oil</sub><br>[%] | C <sub>Emulsifier</sub><br>[%] | Amplitude<br>[%] | Time  | Z- Ave<br>[d.nm]  | PDI          | Viscosity<br>[mPa·s] | Stability |
| N17    | 3%                      | 5%                             | 79               | 3 min | 210±10            | 0.277±0.50   | 300                  | +         |
| N13    | 3%                      | 3%                             | 69               | 2 min | 301±17            | 0.476±0.040  | 250                  | -         |
| N18    | 3%                      | 5%                             | 89               | 2 min | 360±20            | 0.375±0.120  | 500                  | -         |
| N23    | 5%                      | 3%                             | 79               | 3 min | 162±3             | 0.081±0.035  | 466                  | +         |
| N6     | 1%                      | 3%                             | 89               | 1 min | 45±0.2            | 0.062±0.006  | 278.5                | +         |
| N16    | 3%                      | 5%                             | 69               | 1 min | 117±3             | 0.173±0.011  | 376                  | +         |
| N20    | 5%                      | 1%                             | 79               | 1 min | -                 | -            | -                    | -         |
| N21    | 5%                      | 1%                             | 89               | 3 min | -                 | -            | -                    | -         |
| N4     | 1%                      | 3%                             | 69               | 3 min | 100±12            | 0.273±0.023  | 300                  | +         |
| N14    | 3%                      | 3%                             | 79               | 1 min | 70 ±2             | 0.186±0.011  | 395                  | +         |
| N26    | 5%                      | 5%                             | 79               | 2 min | 480±43            | 0.660±0.170  | 600                  | -         |
| N22    | 5%                      | 3%                             | 69               | 1 min | 134 ±4            | 0.164±0.0008 | 480                  | +         |
| N8     | 1%                      | 5%                             | 79               | 1 min | 176±32            | 0.399±0.232  | 213                  | -         |
| N9     | 1%                      | 5%                             | 89               | 3 min | 250.1±50          | 1.000        | 238                  | -         |
| N25    | 5%                      | 5%                             | 69               | 3 min | 560±60            | 0.89±0.13    | 780                  | -         |
| N10    | 3%                      | 1%                             | 69               | 3 min | 155±5             | 0.117±0.02   | 497.5                | +         |
| N11    | 3%                      | 1%                             | 79               | 2 min | 163 ±4            | 0.127±0.009  | 569.5                | +         |
| N5     | 1%                      | 3%                             | 79               | 2 min | 48±0.2            | 0.164±0.032  | 365.5                | +         |
| N12    | 3%                      | 1%                             | 89               | 1 min | 161±5             | 0.166±0.016  | 313                  | +         |
| N7     | 1%                      | 5%                             | 69               | 2 min | 43.41±4           | 0.134±0.019  | 422                  | +         |
| N2     | 1%                      | 1%                             | 79               | 3 min | 157 ±3            | 0.150±0.006  | 239.7                | +         |
| N15    | 3%                      | 3%                             | 89               | 3 min | 203 ±5            | 0.046±0.005  | 353.5                | +         |

|     |    |    |    |       |         |             |     |   |
|-----|----|----|----|-------|---------|-------------|-----|---|
| N24 | 5% | 3% | 89 | 2 min | 136 ±2  | 0.099±0.019 | 265 | + |
| N3  | 1% | 1% | 89 | 2 min | 110.0±3 | 0.055±0.017 | 505 | + |
| N27 | 5% | 5% | 89 | 1 min | 78± 2   | 0.111±0.013 | 330 | + |
| N1  | 1% | 1% | 69 | 1 min | 62±3    | 0.577±0.015 | 436 | - |
| N19 | 5% | 1% | 69 | 2 min | 181±8   | 0.183±0.043 | 375 | + |
| N28 | 3% | 3% | 79 | 2 min | 85±2    | 0.107±0.009 | 305 | + |

---

Legend: (+) –sample passed the stability tests, and its size did not change with time; (-) - sample did not pass the stability tests and destabilized.

A.

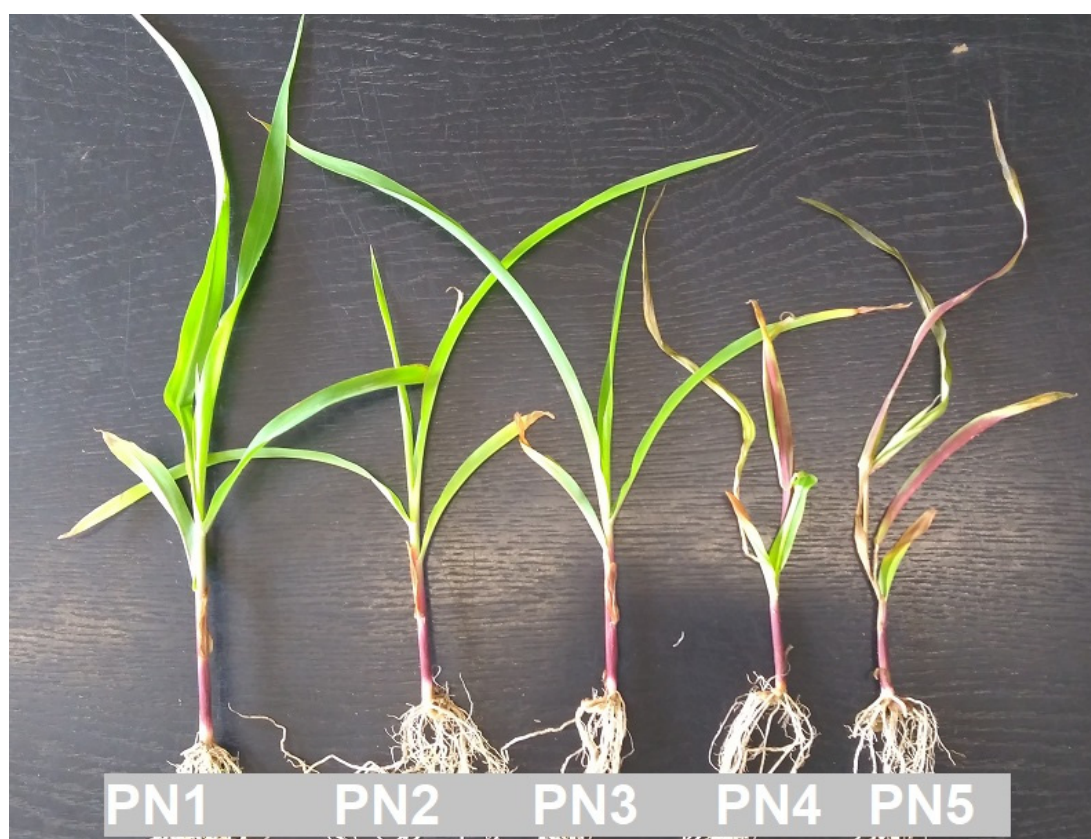

B.

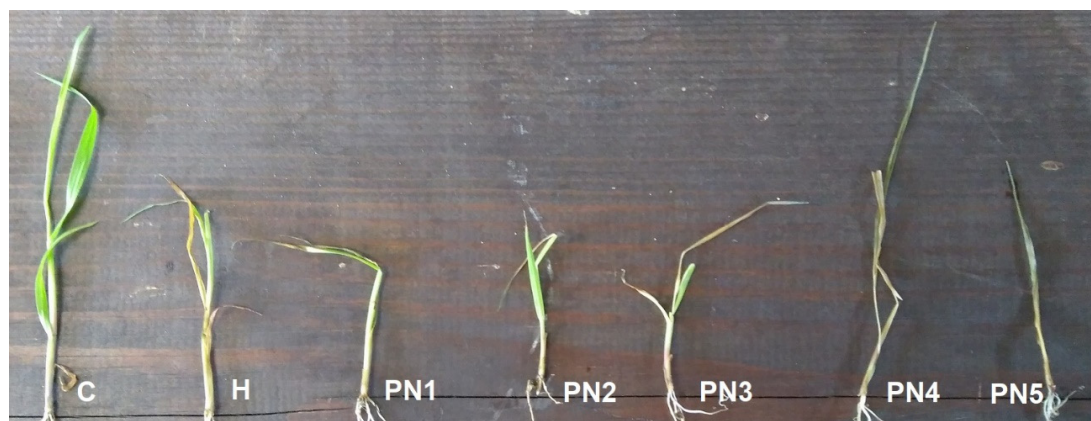

Figure S1. The representative photos of damages caused to maize (A) and barnyard grass (B) seven days after leaf-spraying with the peppermint nanoemulsions. C – water control; H – herbicide; PN1- PN5 – peppermint nanoemulsions.
